# Supplementary material
Source: HighWire-hosted journal article supplement (https://thorax.bmj.com/highwire/filestream/174692/field_highwire_adjunct_files/0/thorax_56_4.pdf)
Supplement: thorax_56_4.pdf [file thorax_56_4.pdf]

British Thoracic Society Guidelines for the Management of Community Acquired Pneumonia in Adults. *Thorax* 2001 Dec; 56(Suppl 4): 1-64.

This has been superseded By 2009 Guideline, *Thorax* 2009 Oct; 64(Suppl 3): 1-55.
